# Supplementary material
Source: publisher figshare collection journal article supplement (https://acs.figshare.com/ndownloader/files/3883636)
Supplement: Supplementary file 1 [file 3883636]

1 **Supplementary Fig. 1. Tissue distribution of MATE1 gene expression in different mouse tissues.** Each  
2 tissue was isolated from C57BL/6J mice then the MATE1 expression was assessed with qPCR. The  
3 expression levels in different tissues were normalized with the levels in the liver as a reference.

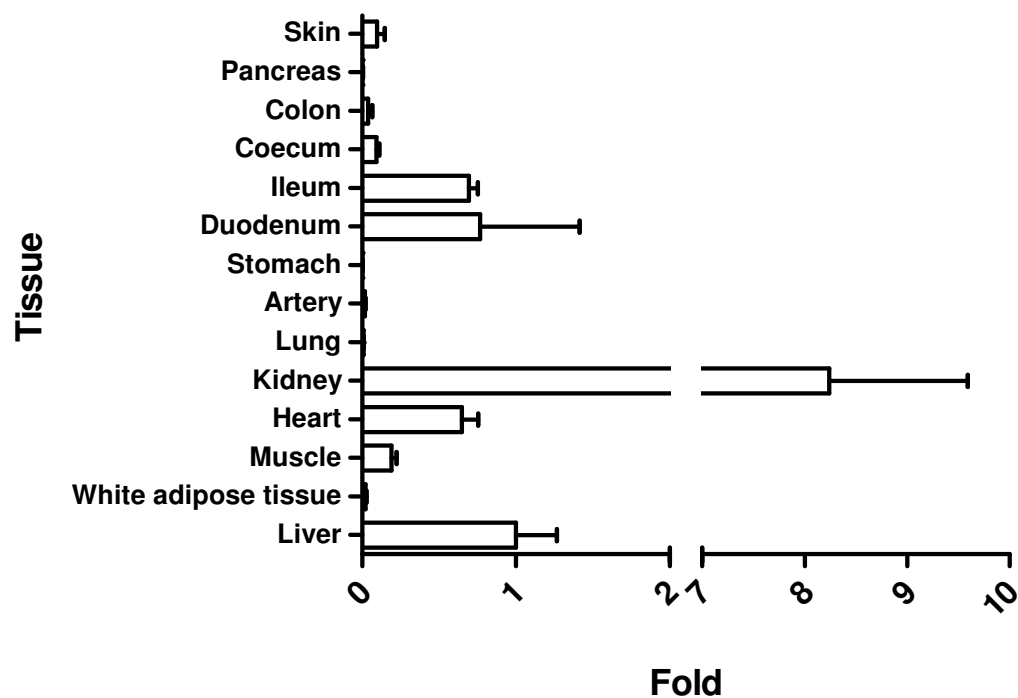

9

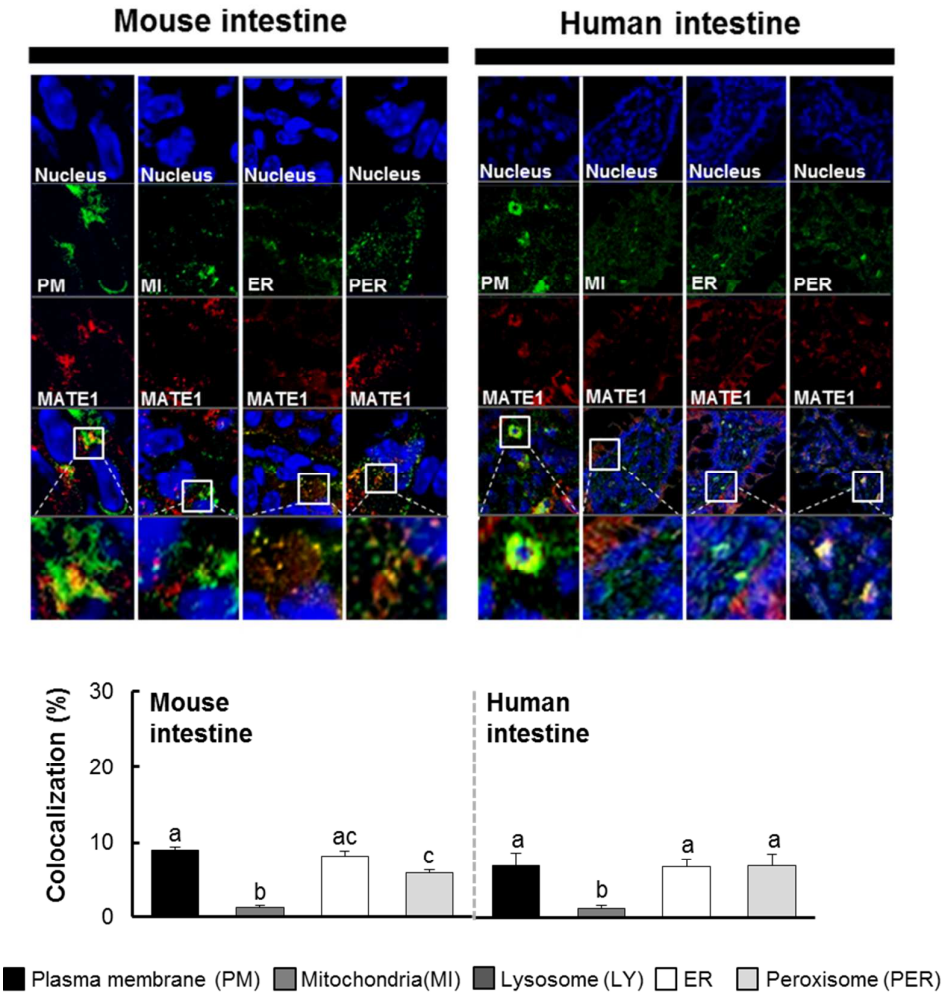

10

11

**Supplementary Fig. 3. Concentration-dependent flavonoid uptake in hMATE cell.** Quercetin-3-*O*-rutinoside (50 and 100  $\mu$ M) was incubated with control or hMATE cell. Fluorescence labeled flavonoids in intracellular space were quantified with FACS analysis.

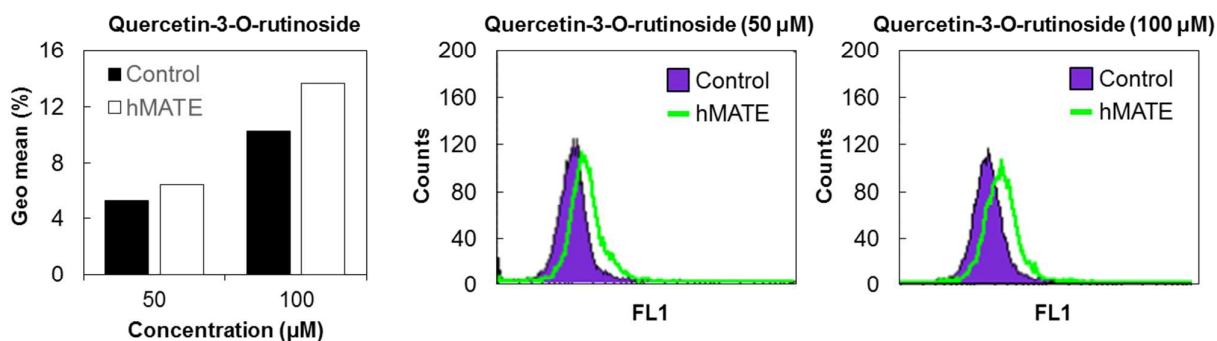

**Supplementary table 1.** Chemical properties of tested flavonoid and cellular flavonoid accumulation in hMATE1 cell.

|                   | Structure                                                                          | Molecular weight (g/mol) | H-bond donor | H-bond acceptor | LogP <sup>†</sup> | Cellular uptake, Area under curve <sup>‡</sup><br>(nmol/5×10 <sup>5</sup> cell ×min) |
|-------------------|------------------------------------------------------------------------------------|--------------------------|--------------|-----------------|-------------------|--------------------------------------------------------------------------------------|
| <b>Quercetin</b>  | 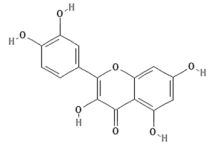  | 302.2                    | 5            | 7               | 1.82              | 127±8 <sup>a</sup>                                                                   |
| <b>Kaempferol</b> |   | 286.2                    | 4            | 6               | 3.11              | 154±8 <sup>b</sup>                                                                   |
| <b>Luteolin</b>   |  | 286.2                    | 4            | 6               | 3.22              | 74±1 <sup>c</sup>                                                                    |

|                                           |                                                                                     |       |   |    |      |                    |
|-------------------------------------------|-------------------------------------------------------------------------------------|-------|---|----|------|--------------------|
| <b>Apigenin</b>                           | 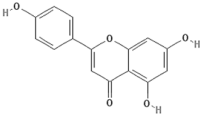   | 270.2 | 3 | 5  | 2.92 | 56±1 <sup>c</sup>  |
| <b>Quercetin<br/>-3-O- glucoside</b>      |    | 464.3 | 8 | 12 | 0.76 | 38±2 <sup>d</sup>  |
| <b>Kaempferol<br/>-3-O-<br/>glucoside</b> |    | 448.4 | 7 | 11 | NA   | 56±2 <sup>cd</sup> |
| <b>Luteolin<br/>-7-O- glucoside</b>       |  | 448.4 | 7 | 11 | NA   | 18±0 <sup>f</sup>  |

|                                           |                                                                                   |       |   |    |    |                    |
|-------------------------------------------|-----------------------------------------------------------------------------------|-------|---|----|----|--------------------|
| <b>Apigenin</b><br><b>-7-O- glucoside</b> |  | 432.4 | 6 | 10 | NA | 34±4 <sup>ef</sup> |
|-------------------------------------------|-----------------------------------------------------------------------------------|-------|---|----|----|--------------------|

<sup>†</sup> Octanol-water partition coefficient, a logarithm of ratio of the HPLC peak area of each compound in octanol to the corresponding peak in the water-based buffer. J. Agric. Food Chem. 2005, 53, 4355-4360

<sup>‡</sup> Cellular flavonoid accumulations were quantified as described in methods during 10 min in hMATE1 cells. Data are calculated from Figure 1a. The values are the means ± SEM. Statistical significance was analyzed using a one-way ANOVA. NA, not available.
